# Supplementary material for: Genetic Alterations in Papillary Thyroid Carcinoma With Hashimoto’s Thyroiditis： ANK3, an Indolent Maintainer of Papillary Thyroid Carcinoma
Source: Front Oncol. 2022 May 12;12:894786. doi: 10.3389/fonc.2022.894786 (PMC9133634; doi:10.3389/fonc.2022.894786)
Supplement: Supplementary Table 1 — The average depth of WES for 10 PTC samples with HT. [file Table_1.xlsx]

## Sheet: Sheet1
Table. S1 The average depth of WES for 10 PTC samples with HT
Sample	Case1_N	Case1_T	Case2_N	Case2_T	Case3_N	Case3_T	Case4_N	Case4_T	Case5_N	Case5_T	Case6_N	Case6_T	Case7_N	Case7_T	Case8_N	Case8_T	Case9_N	Case9_T	Case10_N	Case10_T
Total	137,775,735 (100%)	191,251,821 (100%)	134,930,379 (100%)	162,450,509 (100%)	132,539,573 (100%)	164,392,067 (100%)	133,064,840 (100%)	156,903,603 (100%)	20,850,565 (100%)	32,821,780 (100%)	314,742,553 (100%)	110,269,711 (100%)	95,452,720 (100%)	122,349,720 (100%)	108,118,401 (100%)	173,925,019 (100%)	46,102,045 (100%)	262,263,256 (100%)	131,316,971 (100%)	186,908,661 (100%)
Duplicate	50,321,340 (36.52%)	69,108,335 (36.13%)	44,886,979 (33.27%)	47,878,820 (29.47%)	32,395,491 (24.44%)	47,467,464 (28.87%)	41,082,384 (30.87%)	38,039,309 (24.24%)	15,657,905 (75.10%)	28,185,837 (85.88%)	232,710,707 (73.94%)	67,563,184 (61.27%)	41,596,885 (43.58%)	62,682,753 (51.23%)	50,847,804 (47.03%)	109,934,633 (63.21%)	38,655,438 (83.85%)	215,224,843 (82.06%)	92,449,679 (70.40%)	136,167,635 (72.85%)
Mapped	137,621,985 (99.89%)	190,980,686 (99.86%)	134,754,179 (99.87%)	162,274,224 (99.89%)	132,366,310 (99.87%)	164,207,325 (99.89%)	132,880,618 (99.86%)	156,724,495 (99.89%)	20,721,443 (99.38%)	32,194,537 (98.09%)	314,307,784 (99.86%)	110,117,625 (99.86%)	95,299,921 (99.84%)	122,168,812 (99.85%)	107,927,714 (99.82%)	173,661,552 (99.85%)	45,536,073 (98.77%)	261,835,191 (99.84%)	131,106,450 (99.84%)	186,656,723 (99.87%)
Properly mapped	137,010,249 (99.44%)	190,030,691 (99.36%)	134,110,011 (99.39%)	161,734,077 (99.56%)	131,981,057 (99.58%)	163,683,686 (99.57%)	132,374,072 (99.48%)	156,265,087 (99.59%)	19,602,134 (94.01%)	31,590,636 (96.25%)	308,114,418 (97.89%)	107,354,951 (97.36%)	93,943,490 (98.42%)	117,831,003 (96.31%)	104,115,270 (96.30%)	168,641,486 (96.96%)	42,511,181 (92.21%)	256,266,782 (97.71%)	129,220,448 (98.40%)	180,424,995 (96.53%)
PE mapped	137,530,545 (99.82%)	190,822,212 (99.78%)	134,640,577 (99.79%)	162,164,225 (99.82%)	132,258,379 (99.79%)	164,097,963 (99.82%)	132,762,366 (99.77%)	156,611,813 (99.81%)	20,698,710 (99.27%)	32,116,490 (97.85%)	314,104,443 (99.80%)	110,053,226 (99.80%)	95,221,570 (99.76%)	122,063,970 (99.77%)	107,803,955 (99.71%)	173,508,877 (99.76%)	45,467,435 (98.62%)	261,678,605 (99.78%)	131,011,170 (99.77%)	186,533,704 (99.80%)
SE mapped	182,880 (0.13%)	316,948 (0.17%)	227,204 (0.17%)	219,998 (0.14%)	215,862 (0.16%)	218,724 (0.13%)	236,504 (0.18%)	225,364 (0.14%)	45,466 (0.22%)	156,094 (0.48%)	406,682 (0.13%)	128,798 (0.12%)	156,702 (0.16%)	209,684 (0.17%)	247,518 (0.23%)	305,350 (0.18%)	137,276 (0.30%)	313,172 (0.12%)	190,560 (0.15%)	246,038 (0.13%)
With mate mapped to a different chr	386,123 (0.28%)	608,820 (0.32%)	394,954 (0.29%)	222,517 (0.14%)	172,020 (0.13%)	197,522 (0.12%)	256,947 (0.19%)	256,220 (0.16%)	42,110 (0.20%)	146,410 (0.45%)	4,256,245 (1.35%)	2,062,540 (1.87%)	910,345 (0.95%)	3,407,451 (2.79%)	2,948,578 (2.73%)	3,892,858 (2.24%)	2,486,630 (5.39%)	3,843,806 (1.47%)	1,194,532 (0.91%)	5,106,123 (2.73%)
With mate mapped to a different chr ((mapQ>=5))	366,802 (0.27%)	575,931 (0.30%)	374,833 (0.28%)	208,590 (0.13%)	161,218 (0.12%)	184,408 (0.11%)	241,063 (0.18%)	241,723 (0.15%)	36,122 (0.17%)	129,452 (0.39%)	4,056,274 (1.29%)	1,973,437 (1.79%)	865,612 (0.91%)	3,253,328 (2.66%)	2,817,873 (2.61%)	3,714,184 (2.14%)	2,377,680 (5.16%)	3,662,577 (1.40%)	1,137,407 (0.87%)	4,878,071 (2.61%)
Initial_bases_on_target	60456963	60456963	60456963	60456963	60456963	60456963	60456963	60456963	60456963	60456963	60456963	60456963	60456963	60456963	60456963	60456963	60456963	60456963	60456963	60456963
Initial_bases_near_target	75840481	75840481	75840481	75840481	75840481	75840481	75840481	75840481	75840481	75840481	75840481	75840481	75840481	75840481	75840481	75840481	75840481	75840481	75840481	75840481
Initial_bases_on_or_near_target	136297444	136297444	136297444	136297444	136297444	136297444	136297444	136297444	136297444	136297444	136297444	136297444	136297444	136297444	136297444	136297444	136297444	136297444	136297444	136297444
Total_effective_yield(Mb)	20646.4	28598.6	20194.4	24289.6	19809.1	24561.7	19880.7	23449.3	3154.14	5108.64	47666.6	16762.7	14408.2	18607.3	16389.3	26288.2	7119.63	39882.4	19785.7	28249.4
Effective_sequences_on_target(Mb)	15481.4	20227	14482.6	17590.6	14151.6	17561.7	14138	17017	2492.57	3336.55	35023.2	12321.5	10669.6	12529	11227	17859.3	4675.43	30355.8	14734.3	19622
Effective_sequences_near_target(Mb)	4215.24	6725.89	4757.54	5314.89	4614.77	5661.19	4640.79	5244.68	437.79	930.89	9011.08	2957.07	2646.31	4262.47	3742.54	6139.62	1419.6	6291.02	3606.98	5963.35
Effective_sequences_on_or_near_target(Mb)	19696.7	26952.9	19240.1	22905.5	18766.3	23222.9	18778.8	22261.7	2930.36	4267.44	44034.3	15278.6	13315.9	16791.5	14969.5	23998.9	6095.03	36646.9	18341.3	25585.3
Fraction_of_effective_bases_on_target	0.7498	0.7073	0.7172	0.7242	0.7144	0.715	0.7111	0.7257	0.7903	0.6531	0.7348	0.7351	0.7405	0.6733	0.685	0.6794	0.6567	0.7611	0.7447	0.6946
Fraction_of_effective_bases_on_or_near_target	0.954	0.9425	0.9527	0.943	0.9474	0.9455	0.9446	0.9494	0.9291	0.8353	0.9238	0.9115	0.9242	0.9024	0.9134	0.9129	0.8561	0.9189	0.927	0.9057
Average_sequencing_depth_on_target	256	335	240	291	234	290	234	281	41	55	579	204	176	207	186	295	77	502	244	325
Average_sequencing_depth_near_target	55.58	88.68	62.73	70.08	60.85	74.65	61.19	69.15	5.77	12.27	118.82	38.99	34.89	56.2	49.35	80.95	18.72	82.95	47.56	78.63
Mismatch_rate_in_target_region	0.0036	0.004	0.0038	0.0034	0.0036	0.0034	0.0036	0.0034	0.0045	0.0065	0.0042	0.004	0.0039	0.0043	0.0045	0.0046	0.0056	0.005	0.0043	0.0043
Mismatch_rate_in_all_effective_sequence	0.0038	0.0044	0.0042	0.0037	0.004	0.0037	0.004	0.0037	0.0052	0.0115	0.005	0.0049	0.0045	0.0054	0.0055	0.0056	0.008	0.0058	0.0048	0.0052
Base_covered_on_target	60177454	60205317	60194868	60199015	60197414	60213866	60208711	60216020	51174936	39731130	60154445	60059691	60162358	60126584	60208011	60189438	59060421	60117524	60138966	60137521
Coverage_of_target_region	0.9954	0.9958	0.9957	0.9957	0.9957	0.996	0.9959	0.996	0.8465	0.6572	0.995	0.9934	0.9951	0.9945	0.9959	0.9956	0.9769	0.9944	0.9947	0.9947
Base_covered_near_target	72480433	74695236	74084415	73889066	74003825	74188791	74107611	73782558	23022870	24336669	70538557	66801882	69775713	73689933	73872467	74386135	48082700	62472012	68152620	71800659
Coverage_of_flanking_region	0.9557	0.9849	0.9768	0.9743	0.9758	0.9782	0.9772	0.9729	0.3036	0.3209	0.9301	0.8808	0.92	0.9716	0.9741	0.9808	0.634	0.8237	0.8986	0.9467
Fraction_of_target_covered_with_at_least_10x	0.9878	0.9905	0.9878	0.9889	0.9869	0.9897	0.9893	0.9896	0.6837	0.5249	0.989	0.9766	0.9834	0.9846	0.9865	0.9894	0.8923	0.9868	0.9832	0.9857
Fraction_of_target_covered_with_at_least_50x	0.9345	0.9553	0.9242	0.9399	0.9126	0.9359	0.9315	0.934	0.2819	0.3168	0.9586	0.8828	0.8838	0.9203	0.8666	0.947	0.5239	0.949	0.9161	0.9397
Fraction_of_target_covered_with_at_least_100x	0.8238	0.8839	0.7732	0.8373	0.7512	0.8158	0.7931	0.8059	0.1096	0.1825	0.9143	0.7376	0.6718	0.7829	0.5998	0.8496	0.2589	0.8958	0.8022	0.865
Fraction_of_flanking_region_covered_with_at_least_10x	0.7186	0.8718	0.7981	0.7858	0.7867	0.8072	0.7953	0.7766	0.1548	0.2053	0.7986	0.589	0.5808	0.8154	0.7396	0.8657	0.3873	0.6304	0.6393	0.7989
Fraction_of_flanking_region_covered_with_at_least_50x	0.3435	0.5072	0.3817	0.4094	0.3723	0.4227	0.387	0.3912	0.0267	0.0766	0.5064	0.2539	0.2143	0.3789	0.2744	0.4693	0.1128	0.3776	0.3	0.4556
Fraction_of_flanking_region_covered_with_at_least_100x	0.1708	0.2923	0.1839	0.2194	0.1798	0.2266	0.185	0.2043	0.0065	0.0306	0.3497	0.1155	0.0842	0.1697	0.1217	0.2503	0.0367	0.2534	0.1498	0.2682
