# Supplementary material for: Genetic Alterations in Papillary Thyroid Carcinoma With Hashimoto’s Thyroiditis： ANK3, an Indolent Maintainer of Papillary Thyroid Carcinoma
Source: Front Oncol. 2022 May 12;12:894786. doi: 10.3389/fonc.2022.894786 (PMC9133634; doi:10.3389/fonc.2022.894786)
Supplement: Supplementary Table 3 — The mutation mutation signature of 10 PTC with HT. [file Table_3.xlsx]

## Sheet: Sheet1
Table. S3 The mutation signature of 10 PTC with HT.
our signature	near reference signature	cosine similarity	Correlation_coefficient	filter with cosine similarity > 0.9	cancer types	proposed aetiology	additional mutational features	comments
Signature.A	Signature.5	0.742392	0.441818	not pass	Signature 5 has been found in all cancer types and most cancer samples	Signature 5 has been found in all cancer types and most cancer samples	Signature 5 exhibits transcriptional strand bias for T>C substitutions at ApTpN context	N/A
Signature.B	Signature.11	0.741135	0.720414	not pass	Signature 11 has been found in melanoma and glioblastoma	Signature 11 exhibits a mutational pattern resembling that of alkylating agents. Patient histories h ...	Signature 11 exhibits a strong transcriptional strand-bias for C>T substitutions indicating that mut ...	N/A
Signature.C	Signature.30	0.83516	0.789865	not pass	Signature 30 has been observed in a small subset of breast cancers	The aetiology of Signature 30 remains unknown	N/A	N/A
